# Supplementary material for: The effects of short-term, progressive exercise training on disease activity in smouldering multiple myeloma and monoclonal gammopathy of undetermined significance: a single-arm pilot study
Source: Springer Nature journal article supplement (doi:10.1186/s12885-024-11817-6), 2024-02-05
Supplement: MOESM1 [file 26702136]

# Supplemental Figure 1. Flow cytometry gating strategy for identifying T cell populations.

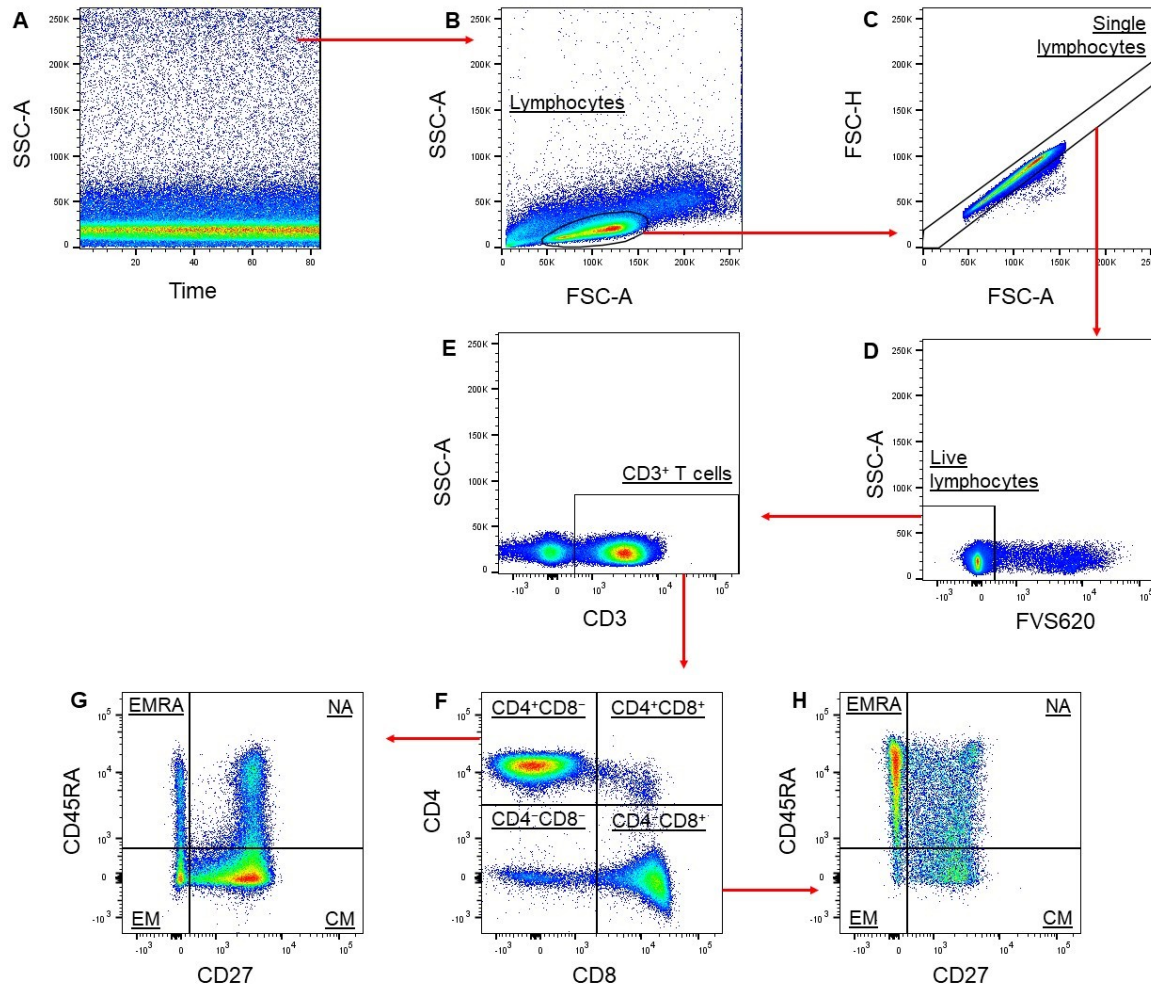

(A) Time gating quality control performed to exclude cells acquired during periods of unstable fluidics; (B) Gating on SSC-A and FSC-A to identify lymphocytes according to morphology; (C) Gating on FSC-H and FSC-A to exclude doublets; (D) Gating on live-dead stain to identify living lymphocytes; (E) Gating on CD3<sup>+</sup> T cells; (F) Quadrant gating of CD4 and CD8 to identify CD4<sup>+</sup> and CD8<sup>+</sup> T cells, plus double-positive and double-negative T cells; (G) Quadrant gating of memory phenotypes within CD4<sup>+</sup> T cells to identify  $T_{NA}$ ,  $T_{CM}$  and  $T_{EM}$  and  $T_{EMRA}$ ; (H) Quadrant gating of memory phenotypes within CD8<sup>+</sup> T cells to identify  $T_{NA}$ ,  $T_{CM}$  and  $T_{EM}$  and  $T_{EMRA}$ . Expression of CTLA4, PD1, CD57, and KLRG1 was examined within total CD4<sup>+</sup> T cell and CD8<sup>+</sup> T cell populations.  $T_{NA}$  = Naïve T cell;  $T_{CM}$  = Central memory T cell;  $T_{EM}$  = Effector memory T cell;  $T_{EMRA}$  = Effector memory T cell re-expressing CD45RA<sup>+</sup>; CTLA4 = Cytotoxic T-lymphocyte associated protein 4; PD1 = Programmed cell death protein 1; KLRG1 = Killer cell lectin like receptor G1.

**Supplemental Figure 2.** Schematic diagram showing the structure of supervised and home-based exercise sessions, in the context of the 16-week exercise programme.

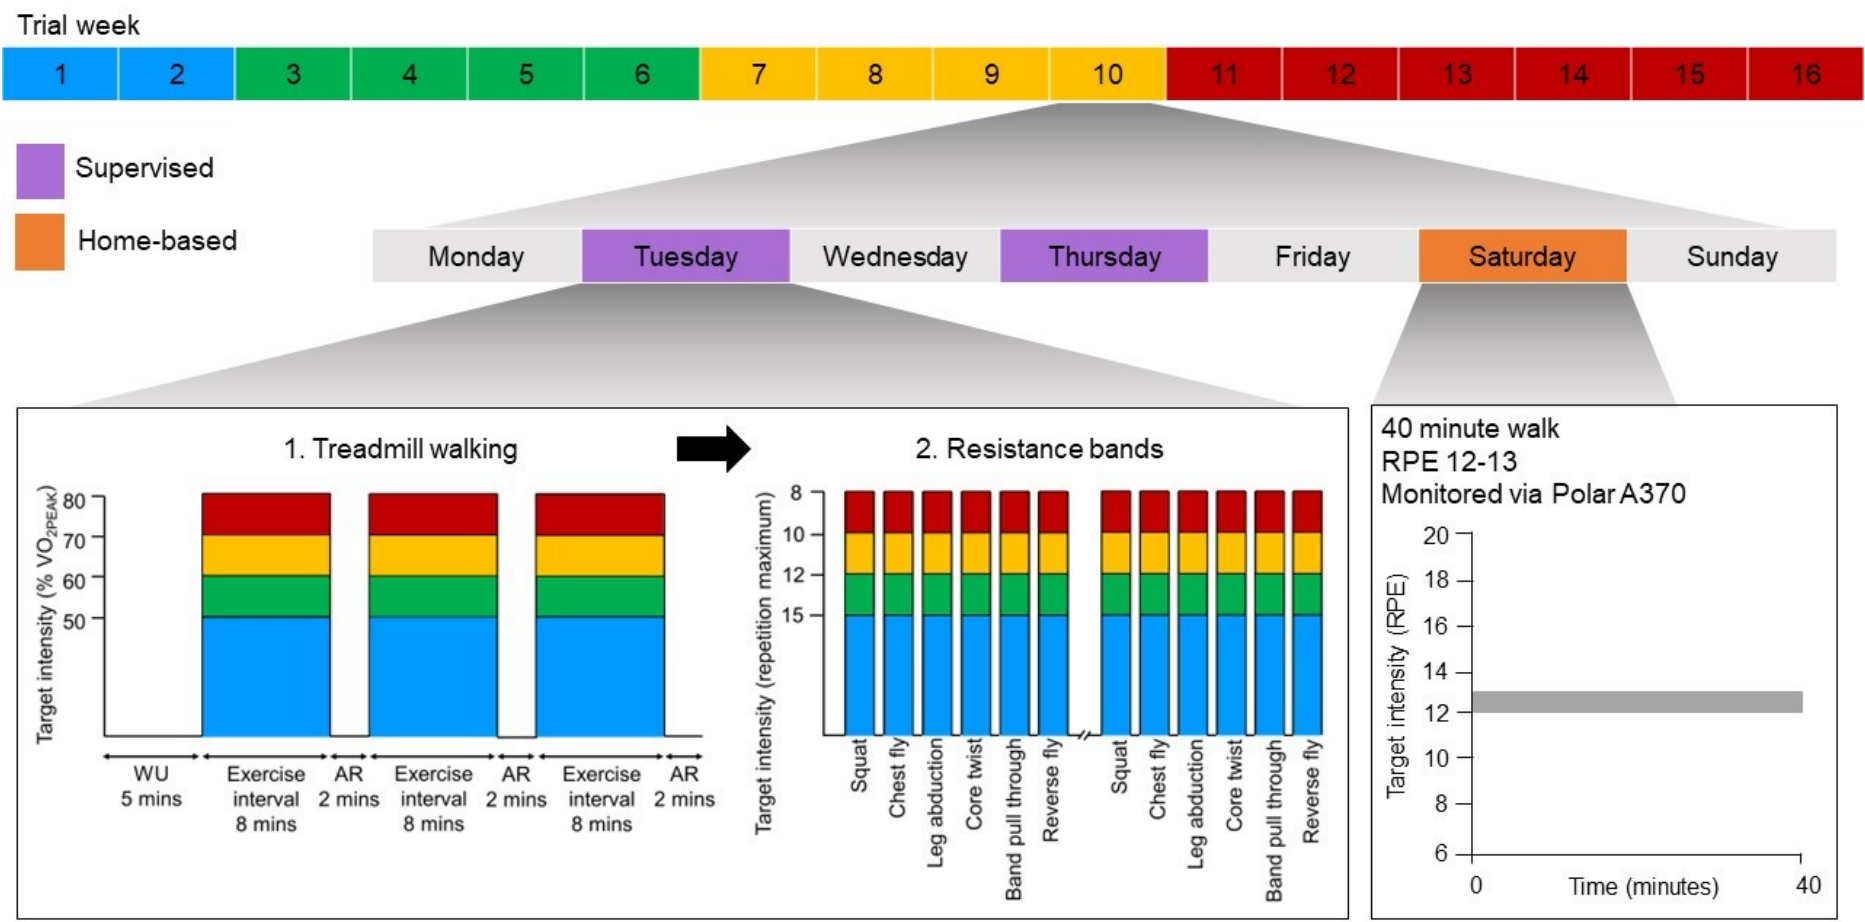

Each trial week comprised two supervised and one home-based exercise session. Colour-coding is used to link the trial week to the prescribed exercise intensities: Blue = weeks 1-2, 40-50%  $\dot{V}O_{2PEAK}$ , 15 repetitions; Green = weeks 3-6, 50-60%  $\dot{V}O_{2PEAK}$ , 12 repetition-maximum; Yellow = weeks 7-10, 60-70%  $\dot{V}O_{2PEAK}$ , 10 repetition-maximum; Red = weeks 11-16, 70-80%  $\dot{V}O_{2PEAK}$ , 8 repetition-maximum. Supervised sessions commenced with a five-minute warm-up, followed by 30 minutes of treadmill walking (8 minutes work:2 minutes active recovery). Next, two sets of six standardised resistance exercises were performed, unless participants experienced pain in given movement patterns, where substitutions were offered, e.g., reverse fly → low row, core twist → side bend, squat → sit-to-stand. Home-based exercise was a 40-minute walk at moderate intensity. The total prescribed weekly volume of aerobic exercise was 100 minutes at moderate intensity in weeks 1-6 and 100 minutes at moderate-vigorous intensity in weeks 7-16. WU = Warm-up; AR = Active recovery;  $\dot{V}O_{2PEAK}$  = Peak oxygen uptake; RPE = Rating of perceived exertion.

**Supplemental Table 1.** Consensus on Exercise Reporting Template (CERT) reporting of exercise programme.

| Section/topic             | Item # | Checklist item                                                                                                                                                                       | Location                              |                                        |
|---------------------------|--------|--------------------------------------------------------------------------------------------------------------------------------------------------------------------------------------|---------------------------------------|----------------------------------------|
|                           |        |                                                                                                                                                                                      | Primary paper (page, table, appendix) | Other (paper or protocol, website URL) |
| WHAT: materials           | 1      | Detailed description of the type of exercise equipment (e.g., weights, exercise equipment such as machines, treadmills, bicycle ergometer etc)                                       | Page 6-7                              |                                        |
| WHO: provider             | 2      | Detailed description of the qualifications, teaching/supervising expertise, and/or training undertaken by the exercise instructor                                                    | Page 6                                |                                        |
| HOW: delivery             | 3      | Describe whether the exercises are performed individually or in a group                                                                                                              | Page 6                                |                                        |
|                           | 4      | Describe whether the exercises are supervised or unsupervised and how they are delivered                                                                                             | Page 6-7                              |                                        |
|                           | 5      | Detailed description of how adherence to exercise is measured and reported                                                                                                           | Page 7                                |                                        |
|                           | 6      | Detailed description of motivational strategies                                                                                                                                      | N/A                                   |                                        |
|                           | 7a     | Detailed description of the decision rule(s) for determining the exercise progression                                                                                                | Page 7                                |                                        |
|                           | 7b     | Detailed description of how the exercise programme was progressed                                                                                                                    | Page 7                                |                                        |
|                           | 8      | Detailed description of each exercise to enable replication (e.g., photographs, illustrations, videos etc)                                                                           | N/A                                   |                                        |
|                           | 9      | Detailed description of any home programme components (e.g., other exercises, stretching etc)                                                                                        | Page 7                                |                                        |
|                           | 10     | Describe whether there are any non-exercise components (e.g., education, cognitive behavioural therapy, massage etc)                                                                 | N/A                                   |                                        |
|                           | 11     | Describe the number and type of adverse events that occurred during exercise                                                                                                         | Page 8                                |                                        |
| WHERE: location           | 12     | Describe the setting in which the exercises are performed                                                                                                                            | Page 6-7                              |                                        |
| WHEN, HOW MUCH: dosage    | 13     | Detailed description of the exercise intervention including, but not limited to, number of exercise repetitions/sets/sessions, session duration, intervention/programme duration etc | Page 7                                |                                        |
| TAILORING: what, how      | 14a    | Describe whether the exercises are generic (one size fits all) or tailored to the individual                                                                                         | Page 7                                |                                        |
|                           | 14b    | Detailed description of how exercises are tailored to the individual                                                                                                                 | Suppl. Fig 2                          |                                        |
|                           | 15     | Describe the decision rule for determining the starting level at which people commence an exercise programme (such as beginner, intermediate, advanced etc)                          | N/A                                   |                                        |
| HOW WELL: planned, actual | 16a    | Describe how adherence or fidelity to the exercise intervention is assessed/measured                                                                                                 | Page 7                                |                                        |
|                           | 16b    | Describe the extent to which the intervention was delivered as planned.                                                                                                              | Page 8                                |                                        |
